# Supplementary material
Source: MDPI journal article supplement (https://www.mdpi.com/2673-3943/4/4/21)
Supplement: s1 [file s1]

**Table S1.** Univariable Gamma model for IMV.

|                           | AME    | 95% CI  |       | p-Value |
|---------------------------|--------|---------|-------|---------|
| BMI, kg/m <sup>2</sup>    | 4.42   | -15.25  | 24.09 | 0.660   |
| Pre-albumin               | -0.28  | -1.936  | 1.379 | 0.742   |
| PNI                       | -157   | -19.09  | 15.06 | 0.861   |
| MNA-SF                    | -57.23 | -146.50 | 32.05 | 0.209   |
| CHI, %                    | -3.74  | -9.10   | 1.617 | 0.171   |
| Muscular density, Hu      | 0.83   | -9.57   | 11.22 | 0.876   |
| SMI, cm <sup>2</sup> /BSA | -0.10  | -0.93   | 0.732 | 0.820   |

*Abbreviations:* AME, average marginal effect; CI, confidential interval; IMV, invasive mechanical ventilation; BMI, body mass index; n, number; PNI, Prognostic Nutritional Index; MNA-SF mini nutritional assessment short-form; CHI, creatinine height index; SMI, skeletal muscle index ; BSA, body surface area; n, number.

**Table S2.** Univariable Gamma model for reintubation.

|                           | AME  | 95% CI |      | p-Value |
|---------------------------|------|--------|------|---------|
| BMI, kg/m <sup>2</sup>    | 1.08 | 0.96   | 1.23 | 0.200   |
| Albumin                   | 1.04 | 0.91   | 1.19 | 0.587   |
| Pre-albumin               | 0.99 | 0.99   | 1.01 | 0.860   |
| PNI                       | 0.97 | 0.88   | 1.07 | 0.557   |
| MNA-SF                    | 1.30 | 0.78   | 2.18 | 0.314   |
| CHI, %                    | 0.99 | 0.96   | 1.01 | 0.245   |
| Muscular density, Hu      | 1.06 | 0.98   | 1.15 | 0.154   |
| SMI, cm <sup>2</sup> /BSA | 0.99 | 0.99   | 1.01 | 0.846   |

*Abbreviations:* AME, average marginal effect; CI, confidential interval; IMV, invasive mechanical ventilation; BMI, body mass index; n, number; PNI, Prognostic Nutritional Index; MNA-SF, mini nutritional assessment short-form; CHI, creatinine height index; SMI, skeletal muscle index ; BSA, body surface area; n, number.

**Table S3.** Univariable Gamma model for overall hospital LOS.

|                           | AME   | 95% CI |      | p-Value |
|---------------------------|-------|--------|------|---------|
| BMI, kg/m <sup>2</sup>    | 0.28  | -1.06  | 1.63 | 0.680   |
| Albumin                   | -0.28 | -1.76  | 1.19 | 0.706   |
| Pre-albumin               | 0.01  | -0.10  | 0.12 | 0.910   |
| PNI                       | -0.36 | -1.45  | 0.72 | 0.510   |
| MNA-SF                    | -2.52 | -6.97  | 1.94 | 0.268   |
| CHI, %                    | -0.16 | -0.45  | 0.12 | 0.260   |
| Muscular density, Hu      | -0.15 | -0.82  | 0.51 | 0.650   |
| SMI, cm <sup>2</sup> /BSA | -0.03 | -0.09  | 0.02 | 0.213   |

*Abbreviations:* AME, average marginal effect; CI, confidential interval; IMV, invasive mechanical ventilation; BMI, body mass index; n, number; PNI, Prognostic Nutritional Index; MNA-SF, mini nutritional assessment short-form; CHI, creatinine height index; SMI, skeletal muscle index ; BSA, body surface area; n, number.

**Table S4.** Univariable Gamma model for 30-day rejection.

|                           | AME  | 95% CI |      | p-Value |
|---------------------------|------|--------|------|---------|
| BMI, kg/m <sup>2</sup>    | 0.99 | 0.89   | 1.10 | 0.850   |
| Albumin                   | 1.04 | 0.93   | 1.16 | 0.489   |
| Pre-albumin               | 1.00 | 0.99   | 1.01 | 0.827   |
| PNI                       | 0.99 | 0.90   | 1.08 | 0.734   |
| MNA-SF                    | 0.90 | 0.61   | 1.32 | 0.598   |
| CHI, %                    | 1.01 | 0.99   | 1.03 | 0.445   |
| Muscular density, Hu      | 0.97 | 0.91   | 1.03 | 0.256   |
| SMI, cm <sup>2</sup> /BSA | 0.99 | 0.99   | 1.00 | 0.504   |

*Abbreviations:* AME, average marginal effect; CI, confidential interval; IMV, invasive mechanical ventilation; BMI, body mass index; n, number; PNI, Prognostic Nutritional Index; MNA-SF, mini nutritional assessment- short-form; CHI, creatinine height index; SMI, skeletal muscle index ; BSA, body surface area; n, number.

**Table S5.** Main findings.

|         | Albumin Value                                                                      | PNI Score                                                                      | BMI                                                                                                  |
|---------|------------------------------------------------------------------------------------|--------------------------------------------------------------------------------|------------------------------------------------------------------------------------------------------|
| IMV     | (range 30–35 g/L: effect –1.67 h [2.45–0.89], p-value for non-linearity < 0.01)    |                                                                                | -                                                                                                    |
| ICU LOS | (range 30–35 g/L: effect –0.84 days [1.23–0.45], p-value for non-linearity < 0.01) | (range 25–40: effect –1.79 days [3.09–0.50], p-value for non-linearity = 0.01) | (range 20.7–27.40 kg/m <sup>2</sup> : effect –0.34 days [0.03–0.68], p-value for non-linearity 0.04) |

*Abbreviations:* BMI, body mass index; PNI, Prognostic Nutritional Index; IMV, invasive mechanical ventilation; ICU LOS, intensive care unit long of stay.
